# Supplementary material for: Synergetic effects of ligand exchange and reduction process enhancing both electrical and optical properties of Ag nanocrystals for multifunctional transparent electrodes
Source: Royal Society of Chemistry journal article supplement (doi:10.1039/c8nr05212c), 2018-01-01
Supplement: c8nr05212c1.pdf [file c8nr05212c1.pdf]

## Supporting Information

# Synergetic effects of ligand exchange and reduction process enhancing both electrical and optical properties of Ag nanocrystals for multifunctional transparent electrodes

*Min Su Kang,<sup>a</sup> Hyungmok Joh,<sup>a</sup> Haneun Kim,<sup>a</sup> Hye-won Yun,<sup>a,b</sup> Donggyu Kim,<sup>c</sup> Ho kun Woo,<sup>a</sup>*

*Woo Seok Lee,<sup>a</sup> Sung-Hoon Hong<sup>b</sup> and Soong Ju Oh<sup>\*a</sup>*

<sup>a</sup>Department of Materials Science and Engineering, Korea University, Seoul 02841, Republic of Korea. E-mail: sjoh1982@korea.ac.kr

<sup>b</sup>ICT Materials & Components & Research Laboratory, ETRI, Daejeon 34129, Republic of Korea.

<sup>c</sup>Department of Semiconductor Systems Engineering, Korea University, Seoul 02841, Republic of Korea.

### **Discussion on the analysis of nano-mesh structured transparent Ag NC electrodes**

The performance of transparent Ag NC thin film electrodes was analyzed by fixing the line distance at 300  $\mu\text{m}$  and changing the line width to 5, 10, and 15  $\mu\text{m}$ . When the line width was 5  $\mu\text{m}$ , the average sheet resistance was 9.77  $\Omega/\square$ , 8.42  $\Omega/\square$  at 10  $\mu\text{m}$ , and 7.86  $\Omega/\square$  at 15  $\mu\text{m}$ . As the line width was increased, the sheet resistance decreased. The transmittance was found to be 94.7%, 89.7%, and 85.6% at line widths of 5, 10, and 15  $\mu\text{m}$ , respectively, and the transmittance decreased significantly with increasing line width. Then, an experiment was conducted by changing the pitch to 200, 300, and 400  $\mu\text{m}$  with the line width fixed at 5  $\mu\text{m}$ . The average sheet resistances of the transparent electrodes when the pitch was 200 and 300  $\mu\text{m}$  were 8.47  $\Omega/\square$  and 9.77  $\Omega/\square$ , respectively. However, when the pitch was increased to 400  $\mu\text{m}$ , the sheet resistance greatly increased to 11.17  $\Omega/\square$ . The transmittances of the electrodes with 300 and 400  $\mu\text{m}$  pitch were 94.7%, and 95.46%, respectively, and it decreased to 91.6% at 200  $\mu\text{m}$ .

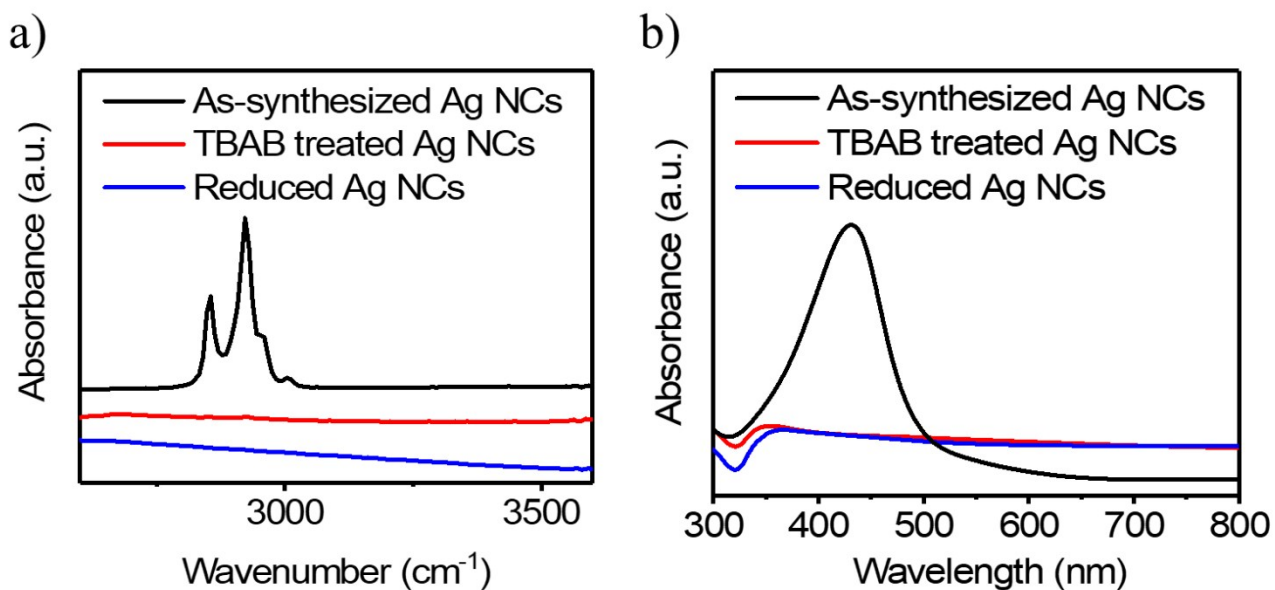

**Fig. S1.** (a) FTIR spectra and (b) UV-visible absorbance of as-synthesized (black), TBAB treated (red) and reduced Ag NC thin films (blue).

For the Ag NC thin film, a peak for CH- stretching was observed at 2900  $\text{cm}^{-1}$ , indicating that Ag was surrounded by oleate ligands. In the Ag NC thin film treated with TBAB, the preceding CH- stretching peak disappeared, indicating that the oleate ligands were replaced with Br ligands. When a hydrazine treatment was additionally performed, no noticeable changes were observed.

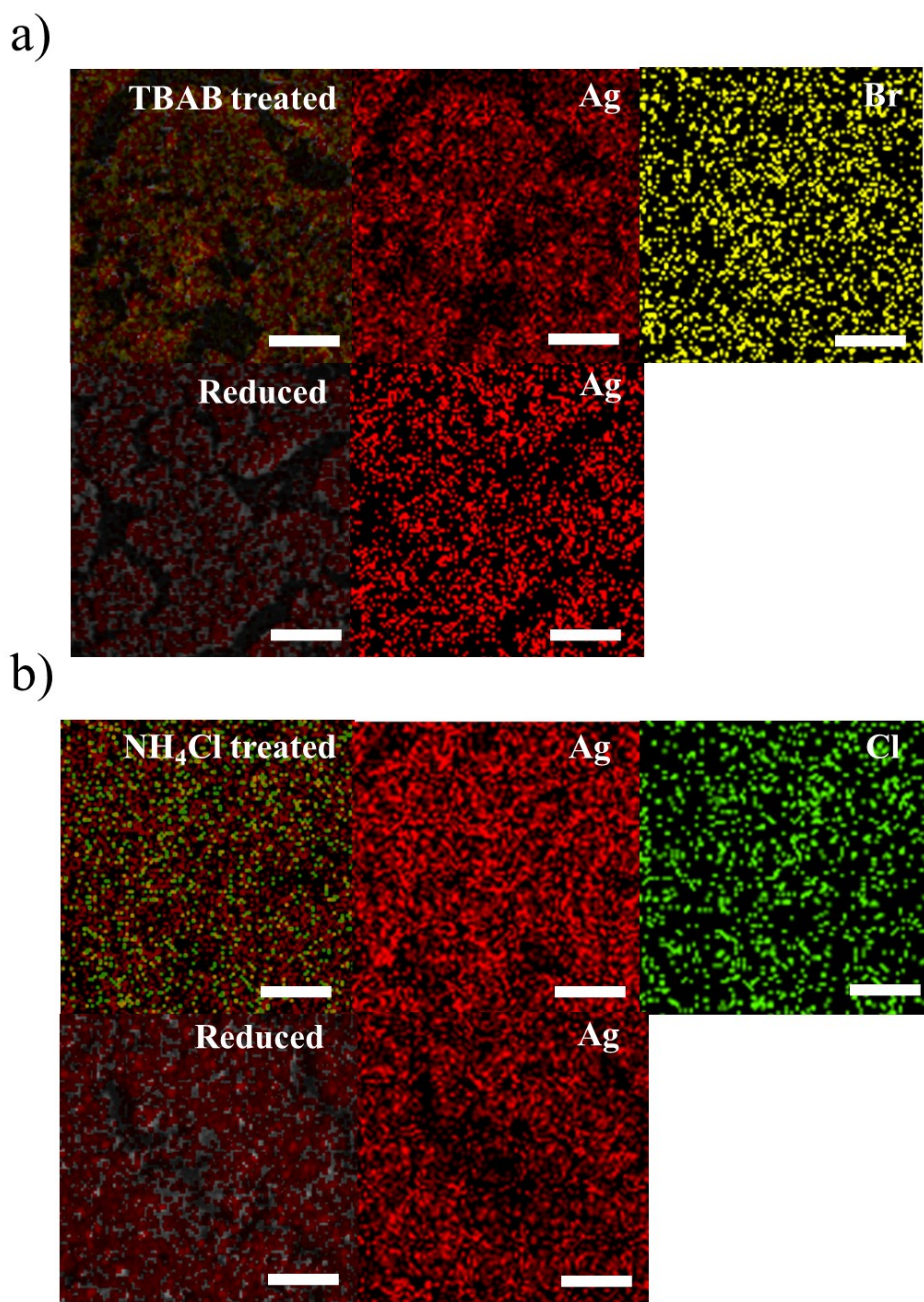

**Fig. S2.** SEM-EDX mapping images of TBAB treated and reduced Ag NC thin films. (b) SEM-EDX mapping images of NH<sub>4</sub>Cl treated and reduced Ag NC thin films. (scale bar: 1  $\mu$ m)

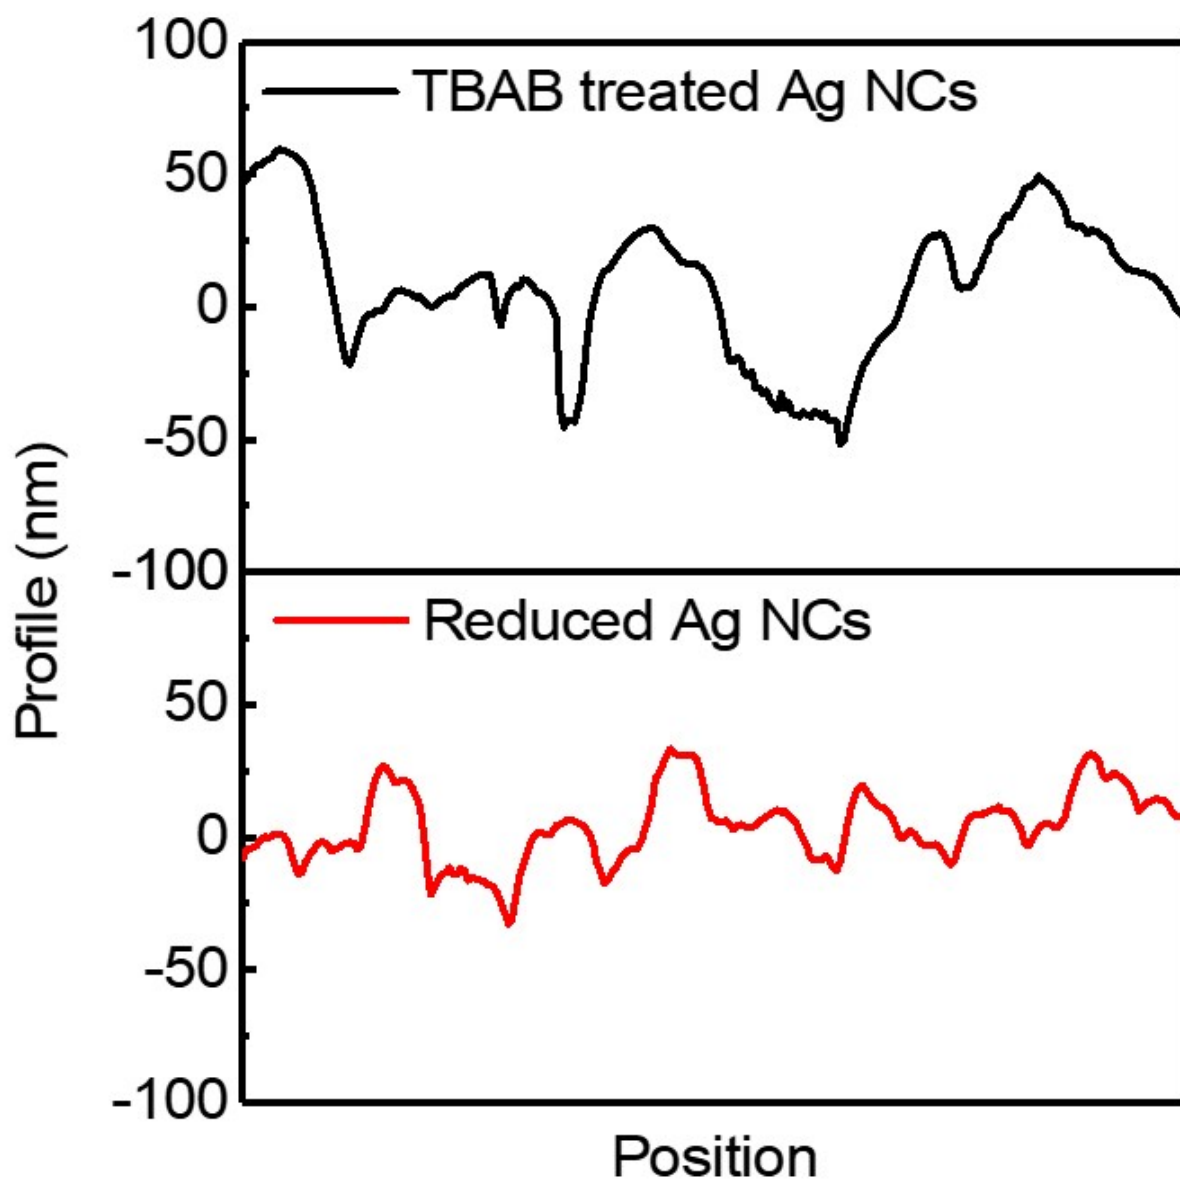

**Fig. S3.** Surface profile of TBAB treated (red) and reduced (blue) Ag NC thin films.

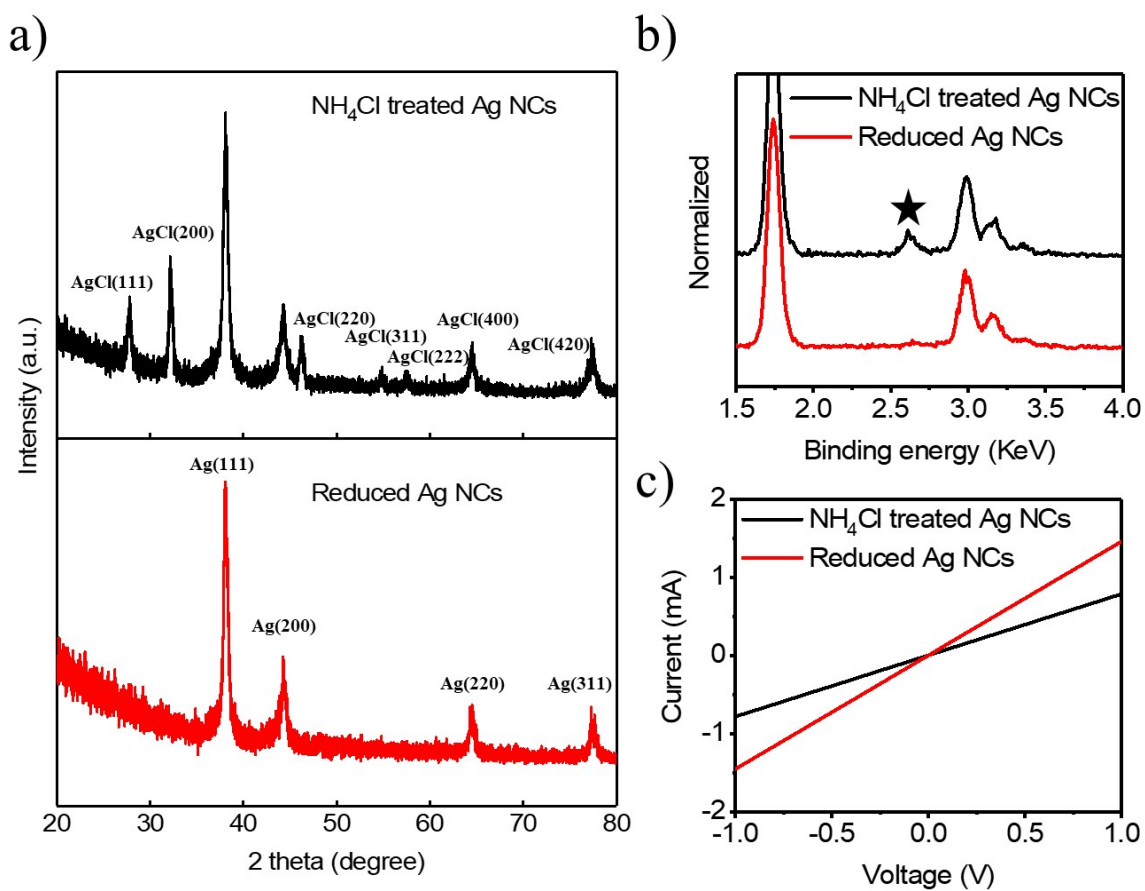

**Fig. S4.** (a) XRD spectra, (b) EDX analysis, and (c) I-V curve of  $\text{NH}_4\text{Cl}$  treated (red) and reduced Ag NC thin films (blue).

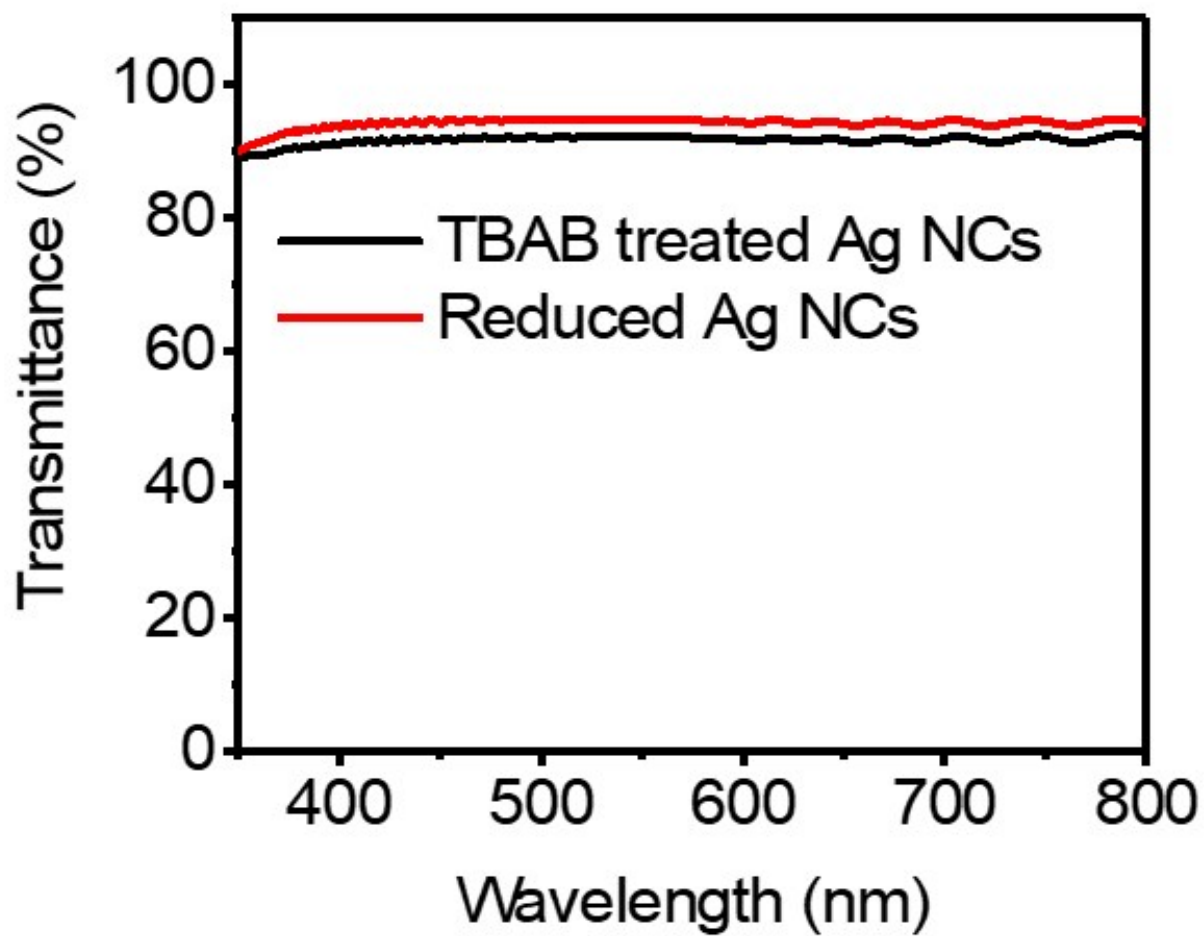

**Fig. S5.** UV-visible transmittance of TBAB treated (black) and reduced (red) nano-mesh structured transparent Ag NC electrode.

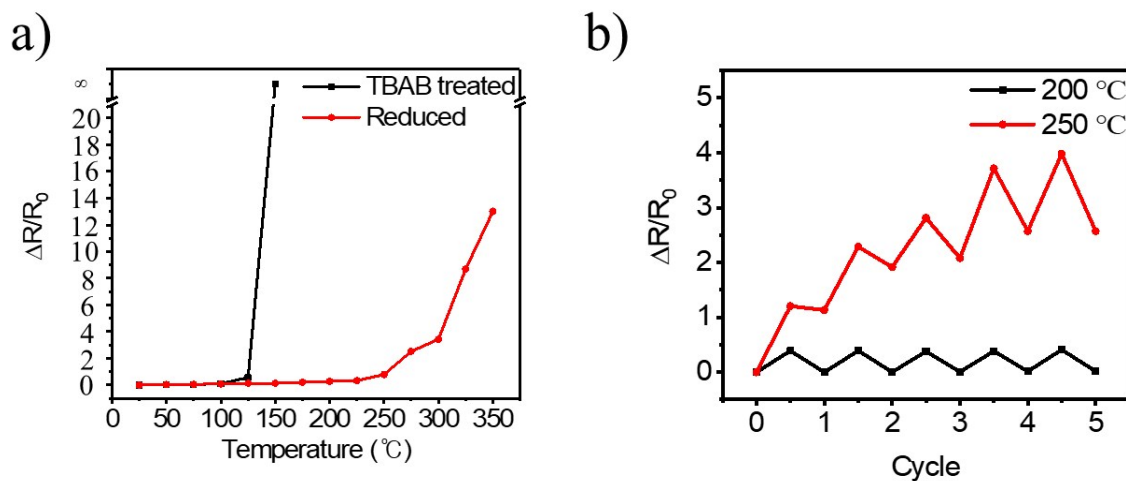

**Fig. S6.** (a) Relative resistance changes in only TBAB treated (black) and reduced (red) transparent electrode with increasing temperature up to 350 °C. (b) Relative resistance changes in the final transparent electrode when 25-200 °C (black) and 25-350 °C (red) temperature cycles are applied.



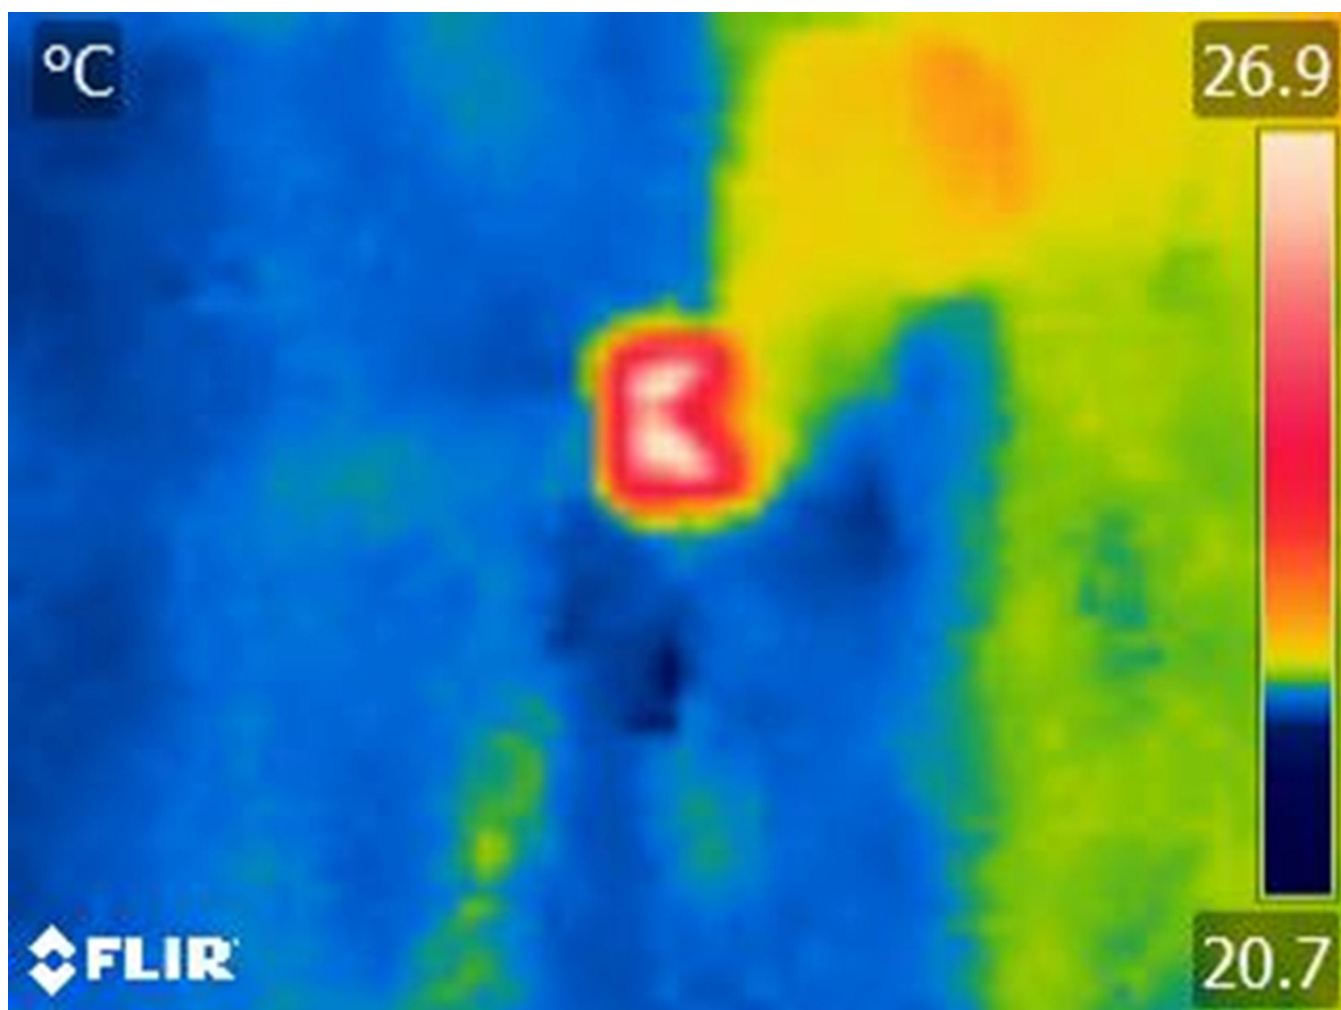

**Fig. S7.** IR image expressing the letter K with our nano-mesh structured transparent Ag NC electrode.
